# Supplementary material
Source: PubMed Central journal article supplement (PMC6450743)
Supplement: NIHMS1519336-supplement-1.pdf [file NIHMS1519336-supplement-1.pdf]

SUPPLEMENTAL ITEMS

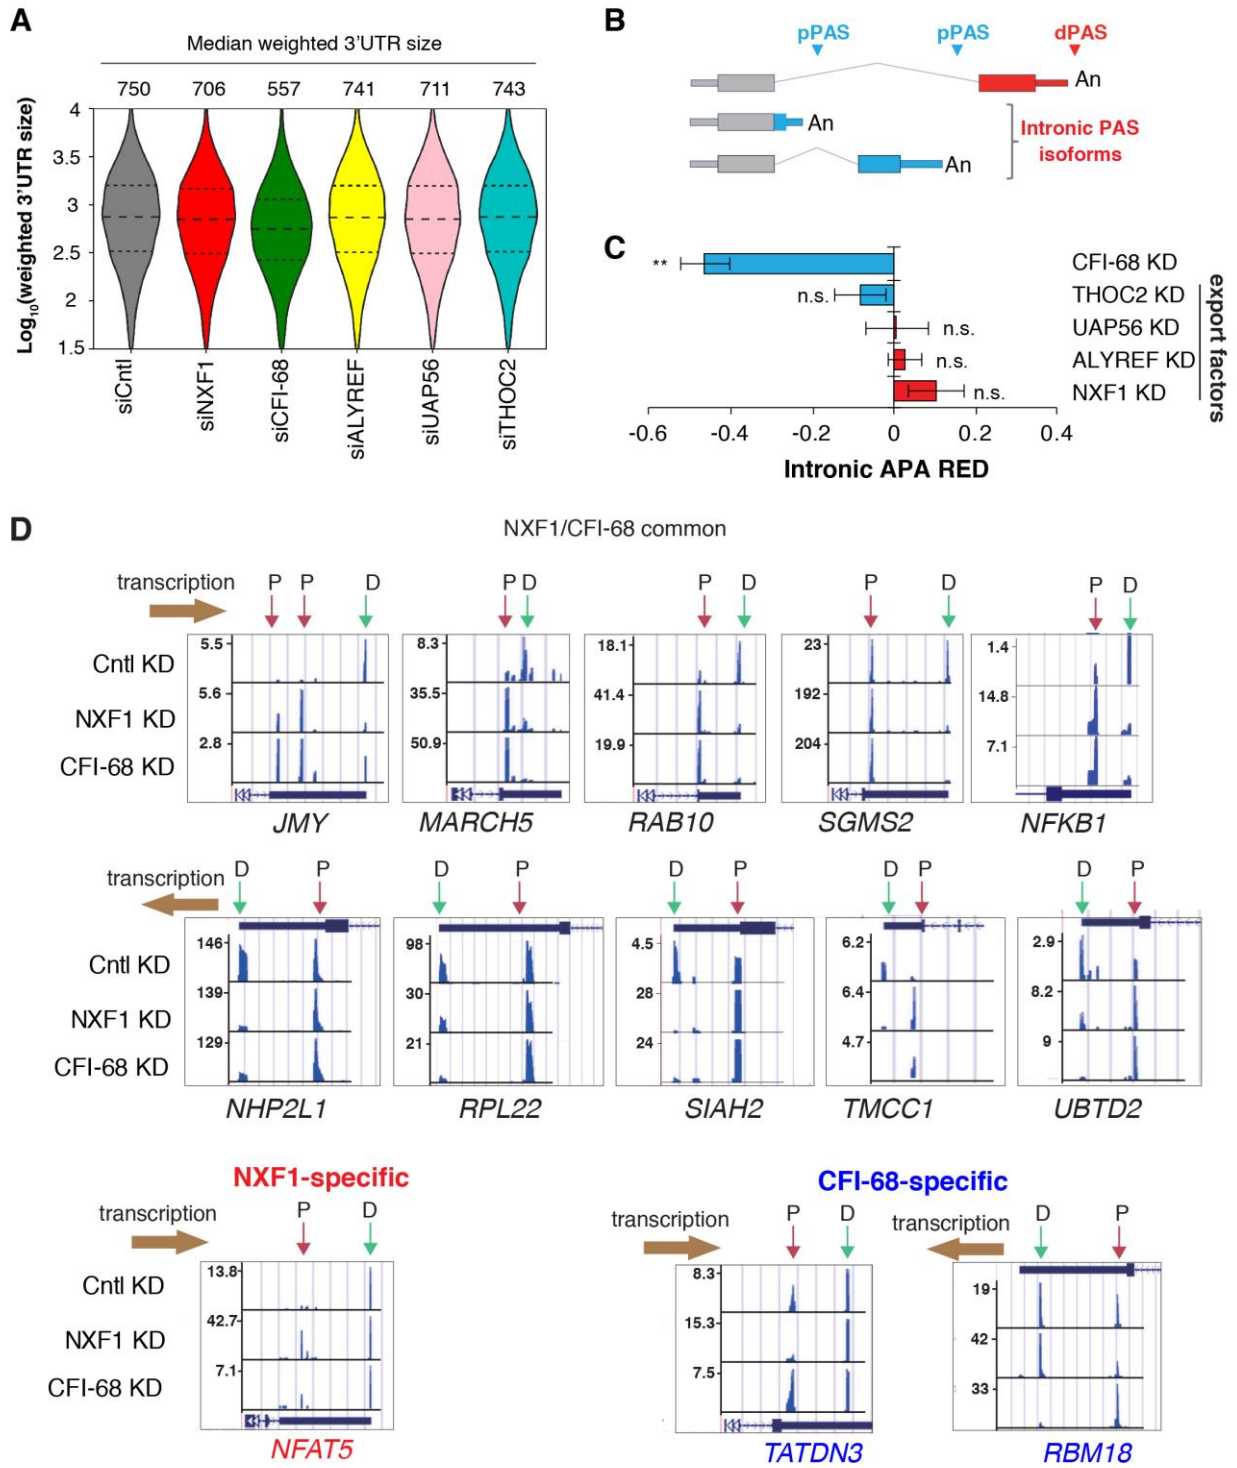

Figure S1

**Figure S1. APA regulation by export factors and CFI-68, Related to Figures 1 and 2.**

(A) The average 3'UTR length of a gene weighted over all isoforms.

(B) Schematic of intronic APA. All intronic APA isoforms were grouped as the pPAS group, and all last exon APA isoforms were grouped as the dPAS group.

(C) Intronic APA RED in different KD samples. RED, relative expression difference between dPAS and pPAS groups. Error bars are standard deviation based on random sampling of data for 20 times.

Statistically significant level was indicated based on FDR cutoffs. (\*\* FDR < 5%, \* FDR < 10%, n.s., not significant).

(D) Genes with 3'UTR shortening in both NXF1 KD and CFI-68 KD cells, in CFI-68 KD cells only, and in NXF1 KD cells only.

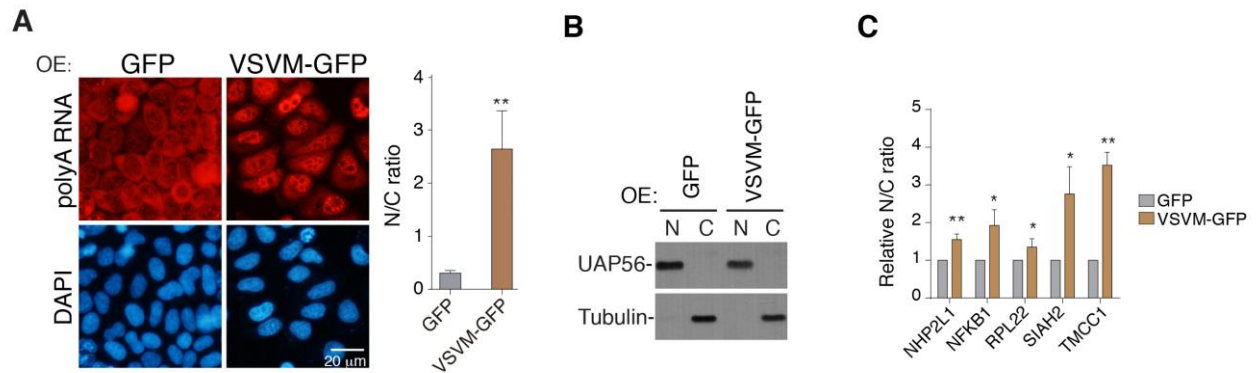

Figure S2

**Figure S2. Overexpression of VSV-M blocked mRNA export, Related to Figure1.**

(A) FISH analysis examining the nucleocytoplasmic distribution of polyA RNAs in control and VSV-M overexpression cells. Data are presented as mean  $\pm$  s.d..

(B) Western blot analysis examining the purity of nuclear and cytoplasmic fractions. UAP56 and Tubulin served as nuclear and cytoplasmic markers, respectively.

(C) RT-qPCR analysis examining nucleocytoplasmic distribution changes of indicated mRNAs upon VSV-M overexpression. Data are presented as mean  $\pm$  s.d..

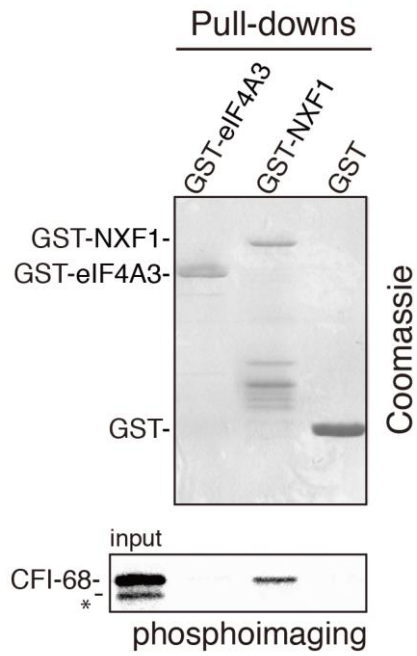

Figure S3

**Figure S3. NXF1 directly interacts with CFI-68, Related to Figure 2.**

Upper panel, Coomassie staining to detect GST-fused proteins. Lower panel, *in vitro*-translated  $^{35}\text{S}$ -labeled CFI-68 pulled down by GST-eIF4A3, GST-NXF1 or GST as visualized by autoradiography. \* indicates a nonspecific band.

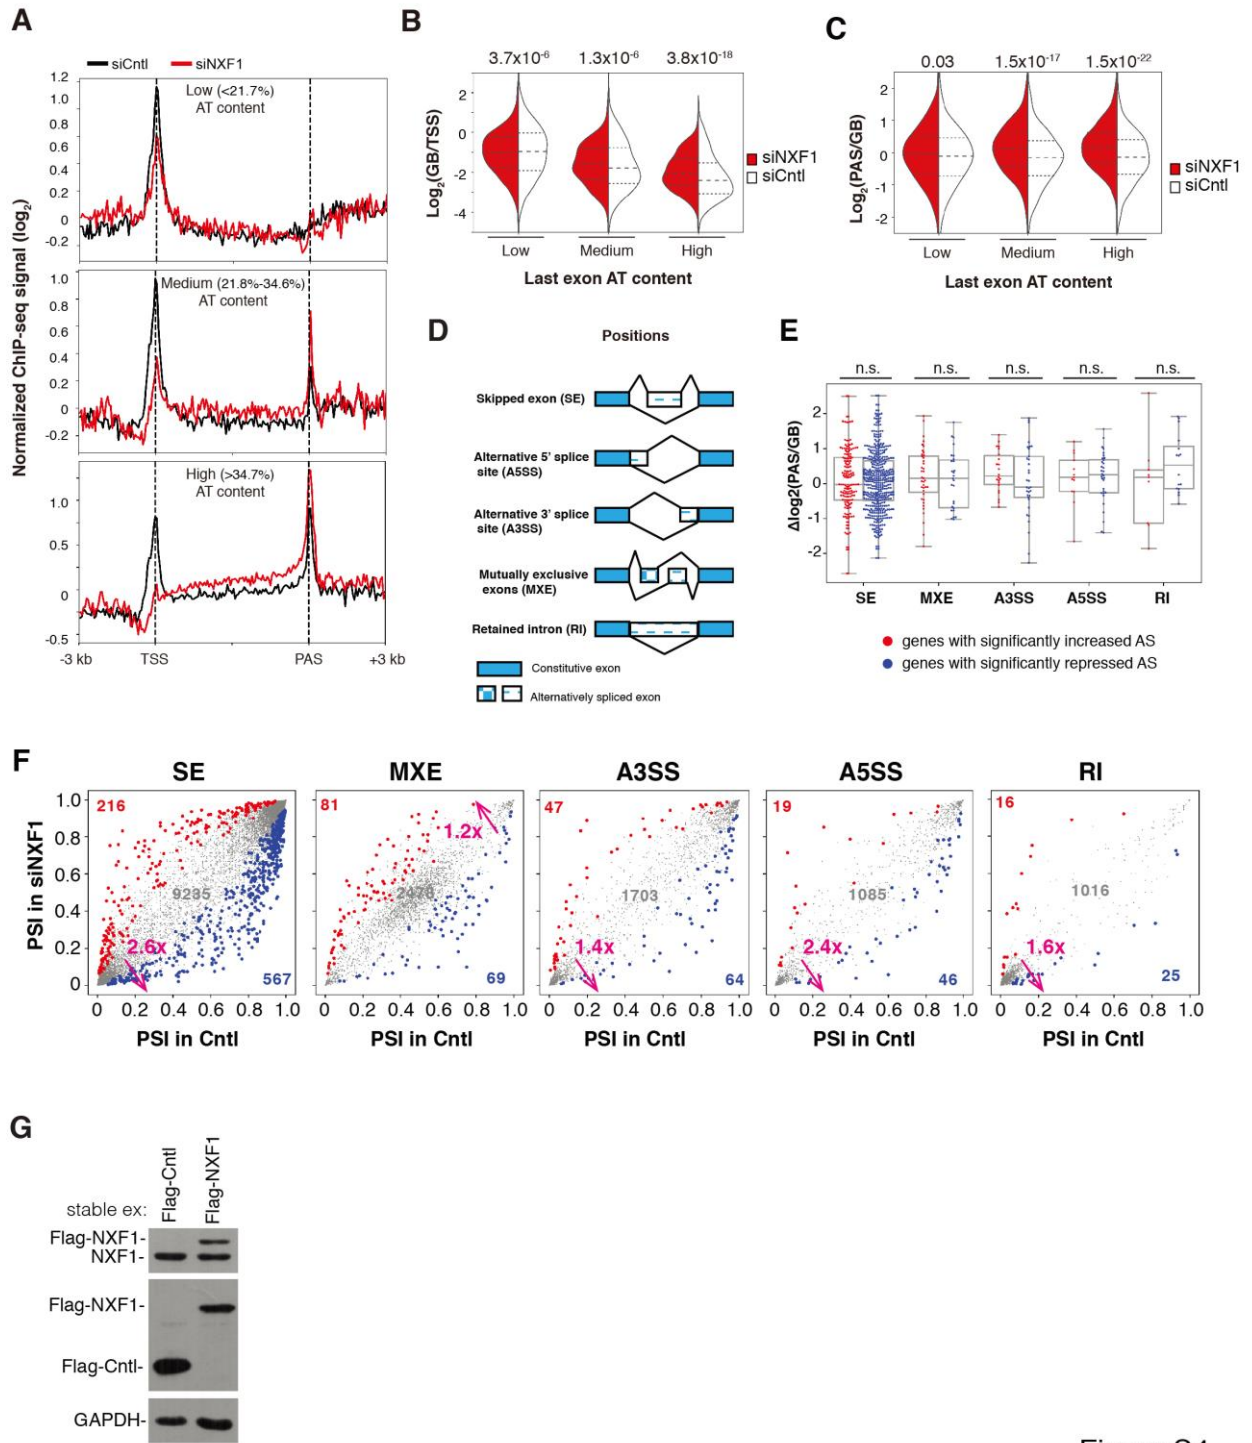

Figure S4

**Figure S4. NXF1 impacts RNP II distribution in gene sets, Related to Figures 4 and 5.**

- (A) Metagene analysis of normalized RNAPII signals ( $\log_2(\text{IP}/\text{input})$ ) along genes with low (top), medium (middle), and high (bottom) AT contents. The contribution of each gene is normalized (ChIP-seq signal of each position of a gene is divided by the signal sum of the gene).
- (B) RNAP II signals in gene body (GB) vs. transcription start site (TSS) in different AT content groups.
- (C) RNAP II signal in PAS region (PAS) vs. gene body (GB) in different AT content groups.
- (D) Schematic of different types of alternative splicing (AS) analyzed here.
- (E) Difference of RNAPII signals in PAS region vs. gene body,  $\Delta\log_2(\text{PAS}/\text{GB})$ , in genes with significantly increased (red) and decreased (blue) indicated AS events in NXF1 KD cells.
- (F) AS changes in siNXF1-treated cells. Events with significant increase (red), decrease (blue), and no change (gray) are indicated. The numbers of events and ratios between events are shown.
- (G) Western analysis of the level of Flag-NXF1 in stable expression cells.

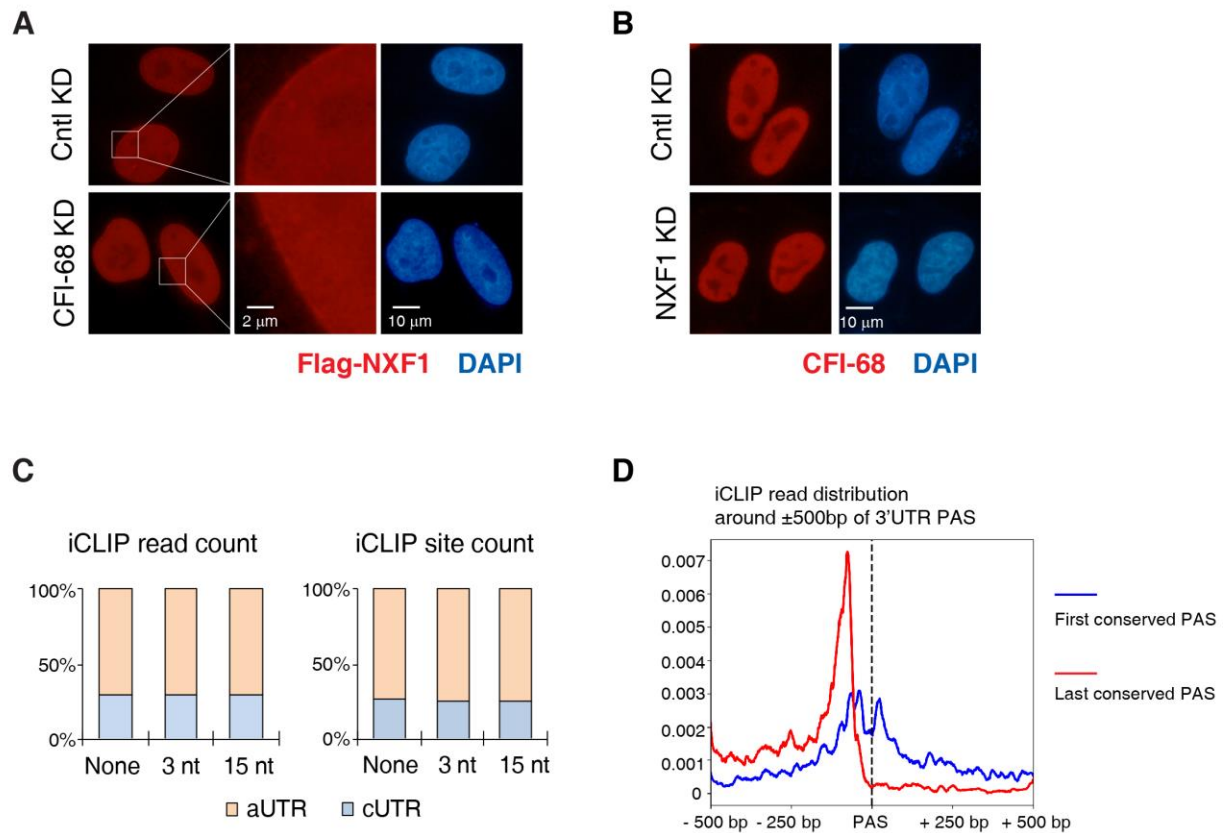

Figure S5

**Figure S5. NXF1 promotes nuclear export of long 3'UTR isoforms, Related to Figure 6.**

- (A) Examination of the localization of Flag-NXF1 in control and CFI-68 KD cells. The higher magnification shows its localization at nuclear pores.
- (B) Examination of CFI-68 localization in control and NXF1 KD cells.
- (C) Percentages of NXF1 iCLIP sites (left panel) and number of iCLIP reads (right panel) in cUTRs (blue) and aUTRs (pink) using different window sizes (none,  $\pm 3$  bp and  $\pm 15$  bp) for clustering iCLIP reads.
- (D) Normalized iCLIP reads mapped to  $\pm 500$  bp region of the first conserved (blue) and last conserved (red) 3'UTR PASs.

**A**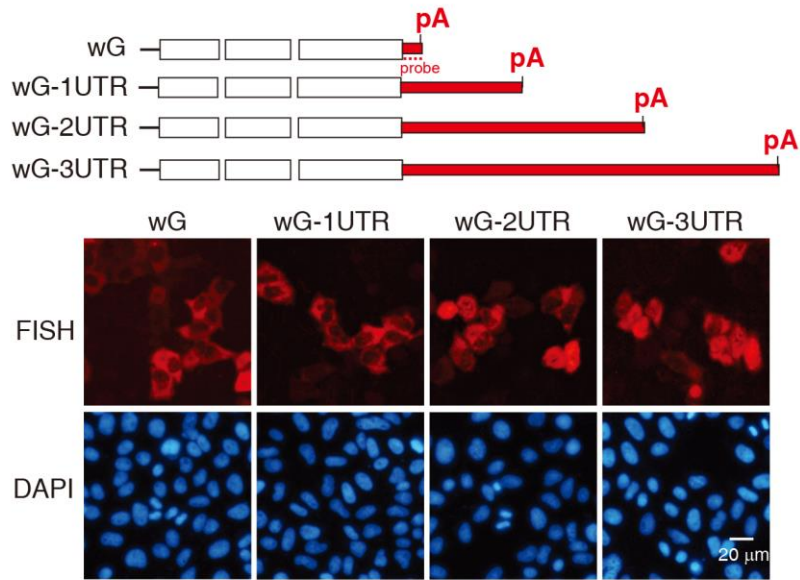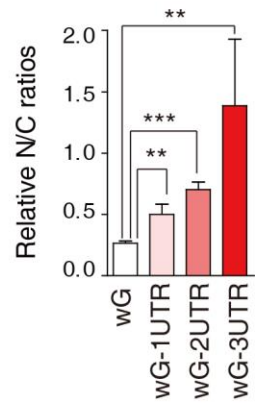**B**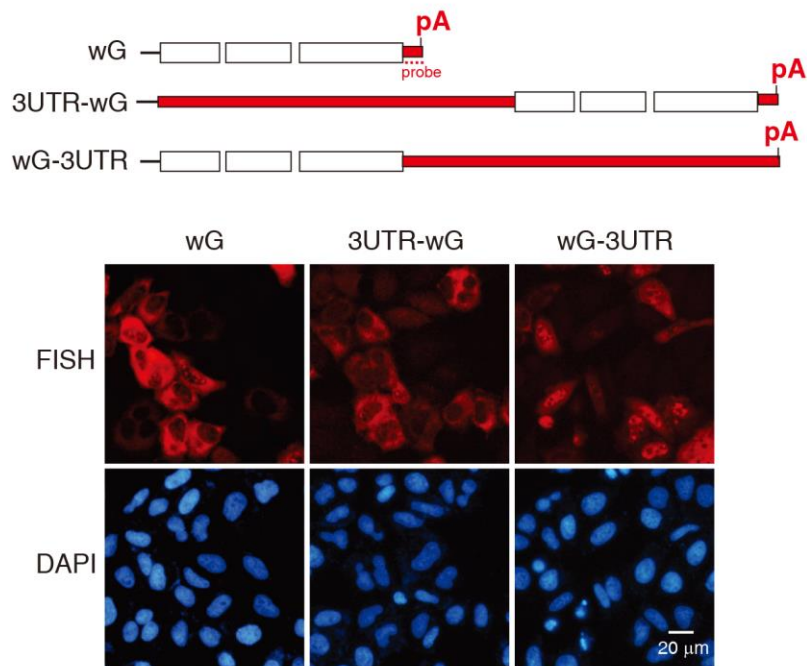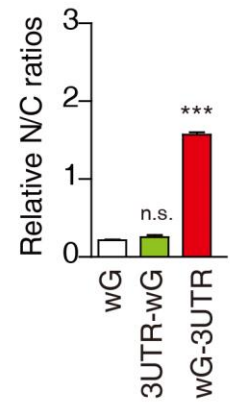

Figure S6



**Figure S6. Inefficient nuclear export of reporter mRNAs with long 3'UTRs is not due to nuclear retention signals, Related to Figure 7.**

- (A) Nuclear export efficiency of  $\beta$ -globin reporter mRNAs decreases as 3'UTR length increases. Top, schematic of  $\beta$ -globin constructs with different 3'UTR lengths. Bottom, FISH to detect the nucleocytoplasmic distribution of  $\beta$ -globin reporter mRNAs at 12 hr time point after transfection. DAPI staining serves as nuclear marker. The graph on the right shows nucleus/cytoplasm (N/C) ratios of different reporter mRNAs. Data are presented as mean  $\pm$  s.d..
- (B) Insertion of the same sequence in 3'UTR, but not in 5'UTR, decreased mRNA nuclear export efficiency. Top, schematic of  $\beta$ -globin constructs. Bottom, FISH to detect the nucleocytoplasmic distribution of  $\beta$ -globin reporter mRNAs at 8 hr time point after transfection. DAPI staining serves as nuclear marker. The graph on the right shows N/C ratios of different reporter mRNAs. Data are presented as mean  $\pm$  s.d..

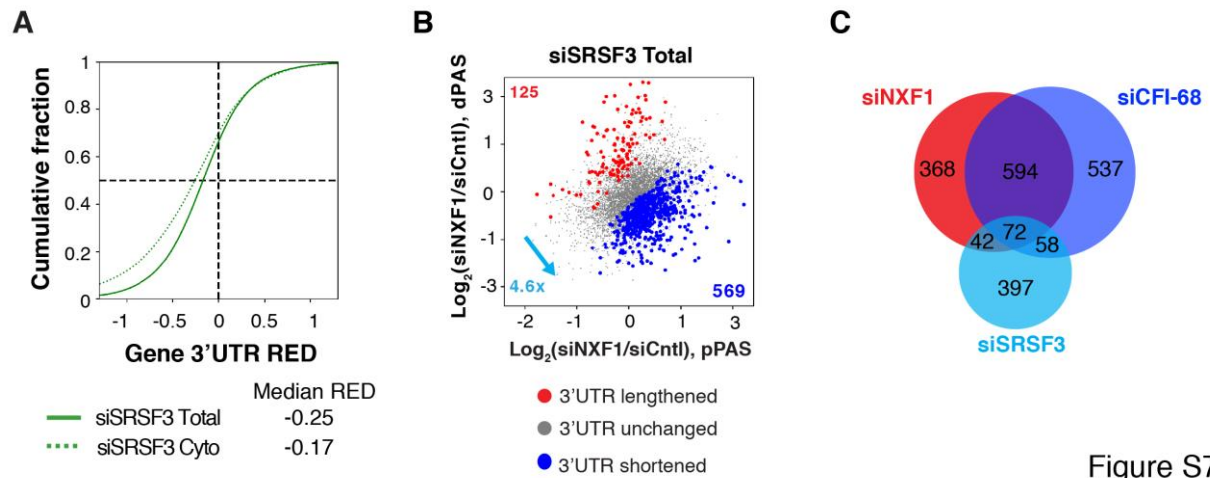

Figure S7

**Figure S7. The APA events regulated by NXF1 and CFI-68 is not highly overlapped with those regulated by SRSF3, Related to Figure 1.**

(A) Cumulative distribution of 3'UTR RED values based on cytoplasmic RNA (dotted line) or total RNA (solid line) data from siSRSF3-treated cells.

(B) 3'UTR APA changes in siSRSF3 cells using total RNA. Genes with significant 3'UTR lengthening (red), 3'UTR shortening (blue) or no change (gray) are indicated. The numbers of genes in each group and ratio of number of lengthening genes to that of shortening genes are shown.

(C) Venn diagram showing overlap of genes with shortened 3'UTRs in the NXF1, CFI-68 and SRSF3 KD cells.

**Table S1. Statistics of PAS and APA in KD and control samples, Related to Figures 1 and 2.**

| Sample   | No. of PAS reads | No. of genes | No. of genic PASs | No. of PASs per gene | No. of APA genes |
|----------|------------------|--------------|-------------------|----------------------|------------------|
| siALYREF | 2,294,055        | 11,101       | 25,349            | 2.28                 | 6,721            |
| siCFI-68 | 3,198,896        | 10,990       | 28,316            | 2.58                 | 7,265            |
| siUAP56  | 3,230,793        | 10,927       | 27,976            | 2.56                 | 7,109            |
| Cntl     | 4,027,034        | 11,431       | 29,524            | 2.58                 | 7,508            |
| siNXF1   | 3,828,508        | 11,415       | 32,166            | 2.82                 | 7,770            |
| siTHOC2  | 3,209,968        | 11,100       | 27,125            | 2.44                 | 7,103            |

**Table S2. Nuclear pore factors present in the NXF1 or Cntl (WDR33) immunoprecipitate, Related to Figures 4 and 5.**

| Gene Name   | MW(kD) | Cntl (WDR33) |        |          | NXF1    |        |          |
|-------------|--------|--------------|--------|----------|---------|--------|----------|
|             |        | Peptide      | Unique | Coverage | Peptide | Unique | Coverage |
| WDR33       | 145.18 | 55           | 55     | 45.94    | 0       | 0      | 0        |
| <b>NXF1</b> | 70.13  | 0            | 0      | 0        | 30      | 30     | 58.64    |
| Nup210      | 204.98 | 0            | 0      | 0        | 35      | 35     | 24.01    |
| Nup214      | 213.49 | 0            | 0      | 0        | 16      | 16     | 9.62     |
| Nup205      | 227.78 | 0            | 0      | 0        | 14      | 14     | 8.8      |
| Nup93       | 93.43  | 0            | 0      | 0        | 7       | 7      | 10.18    |
| Nup98       | 197.46 | 0            | 0      | 0        | 7       | 7      | 4.4      |
| Nup155      | 155.1  | 0            | 0      | 0        | 5       | 5      | 4.53     |
| Nup88       | 83.49  | 0            | 0      | 0        | 3       | 3      | 7.15     |
| Nup133      | 128.9  | 0            | 0      | 0        | 3       | 3      | 4.15     |
| Nup160      | 162.02 | 0            | 0      | 0        | 3       | 3      | 2.3      |
| Nup85       | 74.97  | 0            | 0      | 0        | 2       | 2      | 4.88     |
| Nup37       | 36.68  | 0            | 0      | 0        | 1       | 1      | 4.6      |
| Nup62       | 53.22  | 0            | 0      | 0        | 1       | 1      | 2.68     |
| Nup43       | 42.12  | 0            | 0      | 0        | 1       | 1      | 2.63     |
| Nup107      | 106.31 | 0            | 0      | 0        | 1       | 1      | 1.3      |
| Nup188      | 195.92 | 0            | 0      | 0        | 1       | 1      | 0.74     |
| Gle1        | 79.79  | 0            | 0      | 0        | 2       | 2      | 5.43     |
| Rae1        | 40.94  | 0            | 0      | 0        | 1       | 1      | 7.83     |

**Table S3. siRNAs and Primers used in this study, Related to STAR Methods.**

| <b>siRNAs used in this study</b>          |                  |                                                                   |          |
|-------------------------------------------|------------------|-------------------------------------------------------------------|----------|
| <b>Target gene</b>                        |                  | <b>Targeting sequence</b>                                         |          |
| Luciferase                                |                  | AACAGUCGCGUUUGCUACUUU                                             |          |
| CFI-68                                    |                  | GACCGAGAUUACAUGGAUA                                               |          |
| NXF1                                      |                  | GCGCCAUUCGCGAACGAUUUU                                             |          |
| UAP56                                     |                  | AAGGGCUUGGCUAUCACAUUU                                             |          |
| URH49                                     |                  | AAAGGCCUAGCCAUCACUUUU                                             |          |
| THOC2                                     |                  | GGUUAUGCCAAGCUGAUUG                                               |          |
| ALYREF                                    |                  | TGGGAAACTGCTGGTGTCCAA                                             |          |
| CFI-25                                    |                  | CCUCUUACCAAUUAUACUU                                               |          |
| <b>Cloning primers used in this study</b> |                  |                                                                   |          |
| wS-1UTR                                   | Forward          | CCGGATATCGTGCACCTGACTCCTG                                         |          |
| wS-1UTR                                   | Reverse          | CCGGATATCGTGATACTTGTGGGCCAG                                       |          |
| wS-2UTR                                   | Forward          | CCGGATATCGTGCACCTGACTCCTGAGGAGAA                                  |          |
| wS-2UTR                                   | Reverse          | AAGGAAAAAAGCGGCCGCGTGATACTTGTGG                                   |          |
| wS-3UTR                                   | Forward          | CTAGTCTAGAGTGCACCTGACTCCTGAGGAGAAGTCT                             |          |
| wS-3UTR                                   | Reverse          | AGTCGGGCCCGTGATACTTGTGGG                                          |          |
| wS-3UTR<br>UGUA                           | Forward          | CCGTGCCTTCCTTGACCC TGTA TGTA TGTA<br>TGTA TGTA TGGAAGGTGCCACTCCCA |          |
| wS-3UTR<br>UGUA                           | Reverse          | TGGGAGTGGCACCTTCCATACATACATACATA<br>CATACAGGGTCAAGGAAGGCACGG      |          |
| wG-1UTR                                   | Forward          | CCGGATATCGTGCACCTGACTCCTG                                         |          |
| wG-1UTR                                   | Reverse          | CCGGATATCGTGATACTTGTGGGCCAG                                       |          |
| wG-2UTR                                   | Forward          | CCGGATATCGTGCACCTGACTCCTGAGGAGAA                                  |          |
| wG-2UTR                                   | Reverse          | AAGGAAAAAAGCGGCCGCGTGATACTTGTGG                                   |          |
| wG-3UTR                                   | Forward          | CTAGTCTAGAGTGCACCTGACTCCTGAGGAGAAGTCT                             |          |
| wG-3UTR                                   | Reverse          | AGTCGGGCCCGTGATACTTGTGGG                                          |          |
| 1UTR-wG                                   | Forward          | CCCAAGCTTGTGCACCTGACTCCTGAGGAGAAGT                                |          |
| 1UTR-wG                                   | Reverse          | CGGGGTACCGTGATACTTGTGGGCCAGGG                                     |          |
| 2UTR-wG                                   | Forward          | CGGGGTACCGTGACCTGACTCCTGAGGAGAAGTCTG                              |          |
| 2UTR-wG                                   | Reverse          | CGGGGTACCGTGATACTTGTGGGCCAGGGCA                                   |          |
| 3UTR-wG                                   | Forward          | CCCAAGCTTGTGCACCTGACTCCTGAGG                                      |          |
| 3UTR-wG                                   | Reverse          | CCCAAGCTTGTGATACTTGTGGGCCAGGG                                     |          |
| Flag-CFI-68                               | Forward          | CCGGAATTCAATGGCGGACGGCGTGGAC                                      |          |
| Flag-CFI-68                               | Reverse          | TCTGATATCCTAACGATGACGATATTC                                       |          |
| Flag-NXF1                                 | Forward          | CCGGAATTCAATGGCGGACGAGGGGAAG                                      |          |
| Flag-NXF1                                 | Reverse          | CGGGATCCTCACTTCATGAATGCCAC                                        |          |
| HAGE-Flag-NXF1                            | Forward          | CTAGTCTAGAATGGCGGACGAGGGGAAGTCG                                   |          |
| HAGE-Flag-NXF1                            | Reverse          | CGCGGATCCTCACTTCATGAATGCCACTT                                     |          |
| HAGE-Flag-eIF4A3                          | Forward          | CGACGCGTATGGCGACCACGGCCACGAT                                      |          |
| HAGE-Flag-eIF4A3                          | Reverse          | CGGGATCCTCAGATAAGATCAGCAACGT                                      |          |
| GST-NXF1                                  | Forward          | CGCGGATCCATGGCGGACGAGGGGAAGTCG                                    |          |
| GST-NXF1                                  | Reverse          | ATAAGAATGCGGCCGCTCACTTCATGAATGCCACTT                              |          |
| <b>RT-qPCR primers used in this study</b> |                  |                                                                   |          |
| Gene Name                                 | Targeting Region | Direction                                                         | Sequence |

|        |        |         |                      |
|--------|--------|---------|----------------------|
| TMCC1  | Common | Forward | GTGAAGGTGTGGTGGATA   |
| TMCC1  | Common | Reverse | CGAATGAGTGAGGCAATC   |
| TMCC1  | aUTR   | Forward | GTCGCATAACCAGTTCCA   |
| TMCC1  | aUTR   | Reverse | CACAGAATGAGGCTAAGAGG |
| SIAH2  | Common | Forward | AATACCGTCCCTACTCCT   |
| SIAH2  | Common | Reverse | GAAGGGTGGTAATGCTCT   |
| SIAH2  | aUTR   | Forward | GACTGTCAGCAGATTCT    |
| SIAH2  | aUTR   | Reverse | CTATTAGCCAGCCATCCA   |
| MARCH5 | Common | Reverse | GAGCCGACCATTATTCT    |
| MARCH5 | Common | Forward | AACAGTACAGCCAGAGTG   |
| MARCH5 | aUTR   | Forward | CAGAATCAGCAACTCAAGG  |
| MARCH5 | aUTR   | Reverse | GGACATCACATGGGTAAAG  |
| NFKB1  | Common | Forward | GAAGATGTGGTGGAGGAT   |
| NFKB1  | Common | Reverse | GGGTGGTCAAGAAGTAGT   |
| NFKB1  | aUTR   | Forward | GCATTCCTTCTGACCACA   |
| NFKB1  | aUTR   | Reverse | GGCACATCAAGTGA CTCT  |
| JMY    | Common | Forward | GTGGGAGAAGGAAGAGTC   |
| JMY    | Common | Reverse | GAGGCAGTTCAGAGGTAA   |
| JMY    | aUTR   | Forward | AAGTCTCTCAACCCATCC   |
| JMY    | aUTR   | Reverse | CTGCCAACAATACTCTGC   |
| UBTD2  | Common | Forward | GCACAGACACAGTATTCC   |
| UBTD2  | Common | Reverse | CACAGGTTGGCTCACTAT   |
| UBTD2  | aUTR   | Forward | CACCCTTCTGGAACACTA   |
| UBTD2  | aUTR   | Reverse | GACCTTCTAAGCTGGAT    |
| SGMS2  | Common | Forward | ATAGTGGGACGCAGATTC   |
| SGMS2  | Common | Reverse | CAGGCACAGGTAGAGTAG   |
| SGMS2  | aUTR   | Forward | GGAAGTGTGAGAAGGAGT   |
| SGMS2  | aUTR   | Reverse | GCAACTGAGTCAAAGGAG   |
| RPL22  | Common | Forward | TGTTAGCAACTACGCGCAAC |
| RPL22  | Common | Reverse | GACCATCGAAAGGAGCAAGA |
| RPL22  | aUTR   | Forward | TCAATGCTCAGTCCTACC   |
| RPL22  | aUTR   | Reverse | TGACGGCAGAGAAGAAAT   |
| NHP2L1 | Common | Forward | CTGAGGCTGATGTGAATCC  |
| NHP2L1 | Common | Reverse | ATGACTGCTGAACGAGGT   |
| NHP2L1 | aUTR   | Forward | AACAGAGATGGTGGAGTC   |
| NHP2L1 | aUTR   | Reverse | GGATGCTCACAAGAATGG   |
| RAB10  | Common | Forward | CACCATCACAACTCCTA    |
| RAB10  | Common | Reverse | GTCGTCCATATCACACTTG  |
| RAB10  | aUTR   | Forward | GAGGCTGAGTTTAGGACA   |
| RAB10  | aUTR   | Reverse | TATGTGAGCCAAGAGGTC   |
| NFAT5  | Common | Forward | CTGTTGTTGCTGCTGGAT   |
| NFAT5  | Common | Reverse | GGCTGGAAGAGGTGGTAA   |
| NFAT5  | aUTR   | Forward | TGACCTGTTTCATCTGTGG  |
| NFAT5  | aUTR   | Reverse | GAGCAAAGACTGAATGGC   |
| TATDN3 | Common | Forward | TCCACCAGAAGACCAAAG   |
| TATDN3 | Common | Reverse | TCTAGTCCAACCTCTCCA   |
| TATDN3 | aUTR   | Forward | CCGAGTTCTGGCAGGATA   |
| TATDN3 | aUTR   | Reverse | TCAGTTCAGGTGGTGGTT   |

|                               |         |                                                            |                    |
|-------------------------------|---------|------------------------------------------------------------|--------------------|
| RBM18                         | Common  | Forward                                                    | TACCGAATACCACCTCCT |
| RBM18                         | Common  | Reverse                                                    | CTCTGCTTCCTGCTTAGT |
| RBM18                         | aUTR    | Forward                                                    | GTAGCGGTCTAAGTGGAA |
| RBM18                         | aUTR    | Reverse                                                    | CATTACAGTCTTGGTGCC |
| <b>3' end RT-qPCR primers</b> |         |                                                            |                    |
| 3' END RT PCR Primer          | Reverse | CAAGCAGAAGACGGCATAACGAGA<br>TTTTTTTTTTTTTTTTTTTTTTTTTTTTVN |                    |
| P7 primer                     | Reverse | CAAGCAGAAGACGGCATAACGAGA                                   |                    |
| NFKB1 short                   | Forward | TGTCCCTCTGCTACGTTT                                         |                    |
| NFKB1 long                    | Forward | AATGGTATTTTCCCCCTT                                         |                    |
| SIAH2 short                   | Forward | TTTCGACACAGCCATAGCA                                        |                    |
| SIAH2 long                    | Forward | AGTAGCTGGTGTGAAAGAC                                        |                    |
| <b>ChIP qPCR primers</b>      |         |                                                            |                    |
| RAB10 1                       | Forward | AGGTAAGACCTGTGGGAGGA                                       |                    |
| RAB10 1                       | Reverse | CGGGAAGCAAGATGTCTGGA                                       |                    |
| RAB10 2                       | Forward | TAAGGAAGCTGGGCATGGTG                                       |                    |
| RAB10 2                       | Reverse | AGGCTGGAATGCAATGGCTA                                       |                    |
| RAB10 3                       | Forward | GCAGCAGTATGTCCCAGAGG                                       |                    |
| RAB10 3                       | Reverse | GGCCAAACTGTACCAATGGC                                       |                    |
| RAB10 4                       | Forward | ACGCCCGTAATCCTGACATC                                       |                    |
| RAB10 4                       | Reverse | CACCTGCCAGCTAATTCT                                         |                    |
| RAB10 5                       | Forward | GGTGGTGTGGAGCCTTCTT                                        |                    |
| RAB10 5                       | Reverse | TGGCTGATTGGTTCCAGGAC                                       |                    |
| RAB10 6                       | Forward | ATGCCAGGAAATGTCTACA                                        |                    |
| RAB10 6                       | Reverse | ACAACACTACAATCACAGGAGA                                     |                    |
| TMCC1 1                       | Forward | GCTAACTTCTGGGACGCCAT                                       |                    |
| TMCC1 1                       | Reverse | GGCCCGAGGGACTGTTTAG                                        |                    |
| TMCC1 2                       | Forward | GCCAGCCATGTCCAAGTAA                                        |                    |
| TMCC1 2                       | Reverse | AGGGACACCTGTGGTAGAGT                                       |                    |
| TMCC1 3                       | Forward | GTTGATGGGCTCACCACTGA                                       |                    |
| TMCC1 3                       | Reverse | CTTGTGCATGCTCTCTTGCC                                       |                    |
| TMCC1 4                       | Forward | CCTCAACCCTGACCTCACAG                                       |                    |
| TMCC1 4                       | Reverse | CAGATTTGGCAGGGAGGTGT                                       |                    |
| TMCC1 5                       | Forward | GGATCAAACGAGTGCTGTGC                                       |                    |
| TMCC1 5                       | Reverse | AGACCAGAGTCTCCAGGCAT                                       |                    |
| TMCC1 6                       | Forward | GTGCTCTTCCCTCAGACACC                                       |                    |
| TMCC1 6                       | Reverse | CCTCGCTGCTAAGGTGACAT                                       |                    |
| TMCC1 7                       | Forward | TCCTGGGCTAAGTGCATGTG                                       |                    |
| TMCC1 7                       | Reverse | GCCCAAGACCATCTGCCTAA                                       |                    |
| TMCC1 8                       | Forward | TGGATCTCTCTGGCTTTC                                         |                    |
| TMCC1 8                       | Reverse | ACTGTAGTAGGACTGTGC                                         |                    |
| In                            | Forward | AATCCAGGTGAGCCTGCTTC                                       |                    |
| In                            | Reverse | AACCAAGTGGTGAGGTTGGG                                       |                    |

**Table S4. Statistics of 3'READS+ data, Related to STAR Methods.**

| <b>Sample</b>               | <b>Type</b>     | <b>Raw reads</b> | <b>Uniquely mapped</b> | <b>PAS reads</b> |
|-----------------------------|-----------------|------------------|------------------------|------------------|
| siALYREF, replicate 1       | Total RNA       | 57,435,571       | 13,010,769             | 2,294,055        |
| siCFI-68, replicate 2       | Total RNA       | 40,261,637       | 9,518,029              | 3,198,896        |
| siUAP56, replicate 1        | Total RNA       | 35,440,912       | 8,376,341              | 3,230,793        |
| siCntl, replicate 1         | Total RNA       | 60,610,165       | 15,131,137             | 4,027,034        |
| siNXF1, replicate 1         | Total RNA       | 40,360,020       | 9,955,632              | 3,828,508        |
| siTHOC2, replicate 1        | Total RNA       | 45,878,421       | 10,945,403             | 3,209,968        |
| siCFI-68, Cyto, replicate 1 | Cytoplasmic RNA | 21,152,231       | 14,408,786             | 6,693,981        |
| siCFI-68, Nucl, replicate 1 | Nuclear RNA     | 31,482,862       | 23,230,027             | 11,179,827       |
| siCntl_Cyto, replicate 1    | Cytoplasmic RNA | 16,677,137       | 13,148,681             | 7,777,427        |
| siCntl, Nucl, replicate 1   | Nuclear RNA     | 21,250,652       | 15,294,373             | 7,060,556        |
| siCntl, Cyto, replicate 2   | Cytoplasmic RNA | 44,042,288       | 29,539,173             | 14,419,979       |
| siCntl, Nucl, replicate 2   | Nuclear RNA     | 29,716,185       | 20,024,422             | 9,538,146        |
| siNXF1, Cyto, replicate 1   | Cytoplasmic RNA | 25,206,878       | 18,596,275             | 9,921,956        |
| siNXF1, Nucl, replicate 1   | Nuclear RNA     | 24,514,576       | 17,891,038             | 9,093,806        |
| siCFI-68, replicate 2       | Total RNA       | 13,367,780       | 10,824,155             | 4,936,959        |
| siCntl, replicate 2         | Total RNA       | 12,001,518       | 10,089,105             | 4,672,731        |
| siNXF1, replicate 2         | Total RNA       | 12,774,551       | 10,615,251             | 5,188,485        |

**Table S5. Statistics of ChIP-seq data, Related to STAR Methods.**

| <b>Sample</b>    | <b>Raw reads</b> | <b>Uniquely mapped reads</b> |
|------------------|------------------|------------------------------|
| siCntl_input     | 57,598,942       | 51,347,503                   |
| siCntl_RNAPII_IP | 35,997,408       | 26,629,189                   |
| siNXF1_input     | 53,163,456       | 47,202,800                   |
| siNXF1_RNAPII_IP | 51,981,394       | 15,667,833                   |

**Table S6. Statistics of nascent RNA-seq data, Related to STAR Methods.**

| <b>Sample</b> | <b>Raw Reads</b> | <b>Uniquely mapped reads</b> | <b>Unique 3' ends</b> |
|---------------|------------------|------------------------------|-----------------------|
| siCntl        | 100,354,084      | 47,701,646                   | 17,669,456            |
| siNXF1        | 128,379,794      | 75,903,155                   | 32,446,571            |

Unique 3' ends are unique genomic positions corresponding to the 3' ends of reads.

**Table S7. Statistics of total RNA RNA-seq data, Related to STAR Methods.**

| <b>Sample</b> | <b>Raw reads</b> | <b>Uniquely mapped reads</b> |
|---------------|------------------|------------------------------|
| siCntl        | 20,176,630       | 17,447,827                   |
| siNXF1        | 24,891,840       | 21,766,043                   |
